# Supplementary material for: Body Image Quality of Life in Patients with Hidradenitis Suppurativa Compared with Other Dermatological Disorders
Source: PubMed Central journal article supplement — Acta Derm Venereol. 2020 Apr 6;100(8):5723. doi: 10.2340/00015555-3464 (PMC9128911; doi:10.2340/00015555-3464), 2020-04-06
Supplement: ActaDV-100-8-5723-s1.pdf [file ActaDV-100-8-5723-s1.pdf]

**Table SI. Diagnoses of control patients with other dermatological diagnoses than hidradenitis suppurativa (HS)**

| ICD 10 codes | ICD 10 categories                                                                                                         | Predominant diagnoses                                                                                   | Specific diagnoses                                   | n  |
|--------------|---------------------------------------------------------------------------------------------------------------------------|---------------------------------------------------------------------------------------------------------|------------------------------------------------------|----|
| L40-L45      | Papulosquamous disorders                                                                                                  | Psoriasis (n = 38), hypertrophic lichen planus (n = 1), pityriasis rubra pilaris (n = 1)                | L400, L403, L405, L408, L409, L430, L440             | 40 |
| L20-L30      | Dermatitis and eczema                                                                                                     | Dermatitis (n = 15), pruritus (n = 4)                                                                   | L209, L30, L308, L309, L281, L292, L298, L299        | 19 |
| L80-L99      | Other disorders of the skin and subcutaneous tissue                                                                       | Other disorders of the skin and subcutaneous tissue* (n = 12)                                           | L814, L829, L900, L930, L950, L958, L959, L982, L984 | 12 |
| C43-C44      | Melanoma and other malignant neoplasms of skin                                                                            | Other malignant neoplasms (n = 10)                                                                      | C44, C443, C445, C446, C447, C449                    | 10 |
| L60-L75      | Disorders of skin appendages                                                                                              | Disorders of skin appendages** (n = 7)                                                                  | L639, L662, L663, L708, L709, L719, L738             | 7  |
| L50-L54      | Urticaria and erythema                                                                                                    | Urticaria (n = 7)                                                                                       | L501, L508, L509                                     | 7  |
| L55-L59      | Radiation-related disorders of the skin and subcutaneous tissue                                                           | Actinic keratosis (n = 5)                                                                               | L570                                                 | 5  |
| D10-D36      | Benign neoplasms                                                                                                          | Haemangioma (n = 1), Melanocytic naevi, unspecified (n = 2), benign neoplasm: skin, unspecified (n = 1) | D180, D229, D239                                     | 4  |
| M05-M14      | Inflammatory polyarthropathies                                                                                            | Rheumatoid vasculitis (n = 1), Other psoriatic arthropathies (n = 3)                                    | M052, M073                                           | 4  |
| R50-R69      | General symptoms and signs                                                                                                | Localized hyperhidrosis                                                                                 | R610                                                 | 4  |
| L10-L14      | Bullous disorders                                                                                                         | Bullous pemphigoid                                                                                      | L120                                                 | 3  |
| Z00-Z13      | Persons encountering health services for examination and investigation                                                    | Screening for disease                                                                                   | Z138                                                 | 3  |
| B35-B49      | Mycoses                                                                                                                   | Onychomycosis                                                                                           | B351                                                 | 3  |
| Z80-Z99      | Persons with potential health hazards related to family/personal history and certain conditions influencing health status | Kidney transplant status                                                                                | Z940                                                 | 3  |
| N40-N51      | Diseases of male genital organs                                                                                           | Leukoplakia of penis, Balanoposthitis                                                                   | N481, N480                                           | 2  |
| B00-B09      | Viral infections characterised by skin and mucous membrane lesions                                                        | Viral warts, Other forms of herpesviral infection                                                       | B079, B008                                           | 2  |
| E70-E90      | Metabolic disorders                                                                                                       | Porphyria cutanea tarda, other porphyria                                                                | E802, DE801                                          | 2  |
| I80-I89      | Diseases of veins, lymphatic vessels and lymph nodes, not elsewhere classified                                            | Varicose veins of lower extremities with inflammation/ulcer                                             | I831, I830                                           | 2  |
| K55-K64      | Other diseases of intestines                                                                                              | Fistula of intestine, Anal fissure, unspecified                                                         | K632F, K602                                          | 2  |
| N70-N77      | Inflammatory diseases of female pelvic organs                                                                             | Abscess of vulva                                                                                        | N764                                                 | 1  |
| N80-N98      | Noninflammatory disorders of female genital tract                                                                         | Other specified conditions associated with female genital organs and menstrual cycle                    | N948                                                 | 1  |
| C81-C96      | Malignant neoplasms, stated or presumed to be primary, of lymphoid, haematopoietic and related tissue                     | Mycosis fungoides                                                                                       | C840                                                 | 1  |
| D80-D89      | Certain disorders involving the immune mechanism                                                                          | Sarcoidosis of skin                                                                                     | D863                                                 | 1  |
| H00-H06      | Disorders of eyelid                                                                                                       | Xanthelasma of eyelid                                                                                   | H026                                                 | 1  |
| K00-K14      | Diseases of oral cavity, salivary glands and jaws                                                                         | Recurrent oral aphthae                                                                                  | K120                                                 | 1  |
| M30-M36      | Systemic connective tissue disorders                                                                                      | Rheumatoid vasculitis                                                                                   | M052                                                 | 1  |
| Q65-Q79      | Congenital malformations and deformations of the musculoskeletal system                                                   | Ehlers-Danlos syndrome                                                                                  | Q796                                                 | 1  |
| Q80-Q89      | Other congenital malformations                                                                                            | Congenital non-neoplastic naevus                                                                        | Q825                                                 | 1  |

\*L814: Lentigo (n = 1), L829: Seborrhoeic keratosis (n = 1), L858 Other specified epidermal thickening (n = 1), L900 Lichen sclerosus et atrophicus (n = 2), L930: Discoid lupus erythematosus (n = 1), L950: Livedoid vasculitis (n = 1), L958: Other vasculitis limited to skin (n = 1), L959: Vasculitis limited to skin, unspecified (n = 1), L982: Febrile neutrophilic dermatosis (mb. Sweet) (n = 1), L984: Chronic ulcer of skin, not elsewhere classified (n = 2).

\*\*L639: Alopecia areata, unspecified (n = 1), L662: Folliculitis decalvans (n = 1), L663: Perifolliculitis capitis abscedens (n = 1), L708: Other acne (n = 1), L709: Acne, unspecified (n = 1), L719: Rosacea, unspecified (n = 2), L738: Other specified follicular disorders (n = 1).  
The diagnoses of 22 patients were unavailable.
